# Supplementary material
Source: Springer Nature journal article supplement (https://www.springermedizin.de/resource/supplementary/13256_2012_2200_MOESM1_ESM.pdf/9649262)

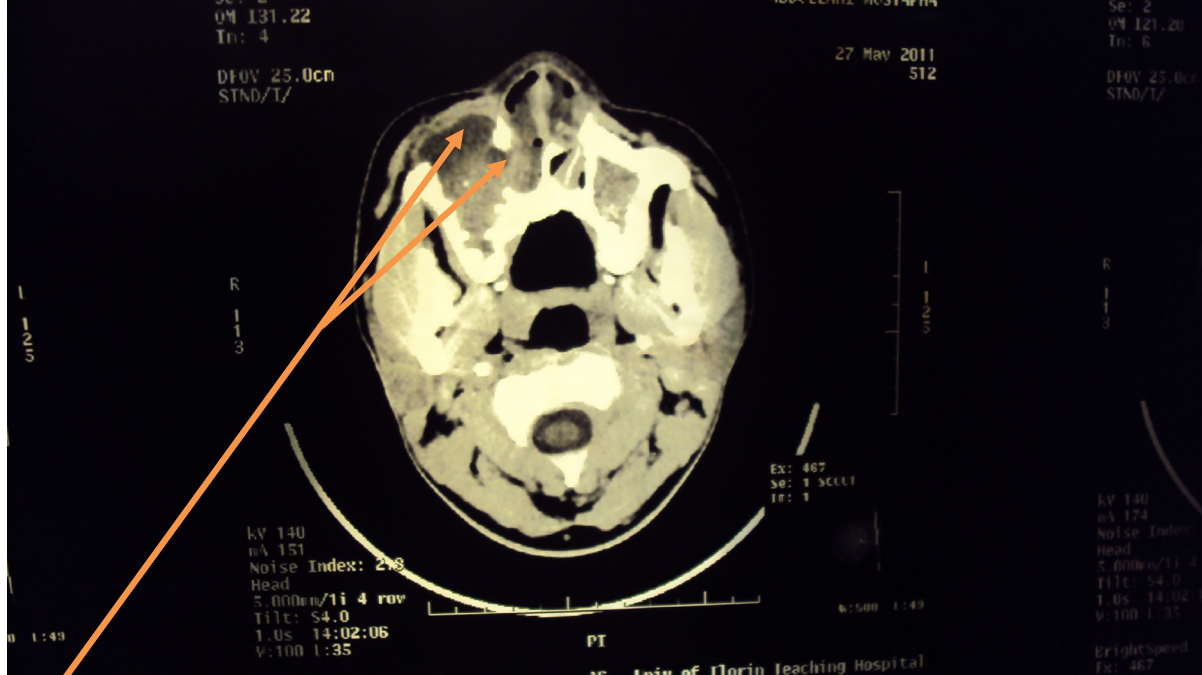

Erosion of the anterior and medial wall of the left antrum

Supplement: MOESM1 [file 9649262]
